# Supplementary material for: Topical Application of Galgeunhwanggeumhwangryeon-Tang Recovers Skin-Lipid Barrier and Ameliorates Inflammation via Filaggrin-Thymic Stromal Lymphopoietin-Interleukin 4 Pathway
Source: MDPI journal article supplement (doi:10.3390/medicina57121387), 2021-12-20
Supplement: s1 [file s1]

## Supplementary materials

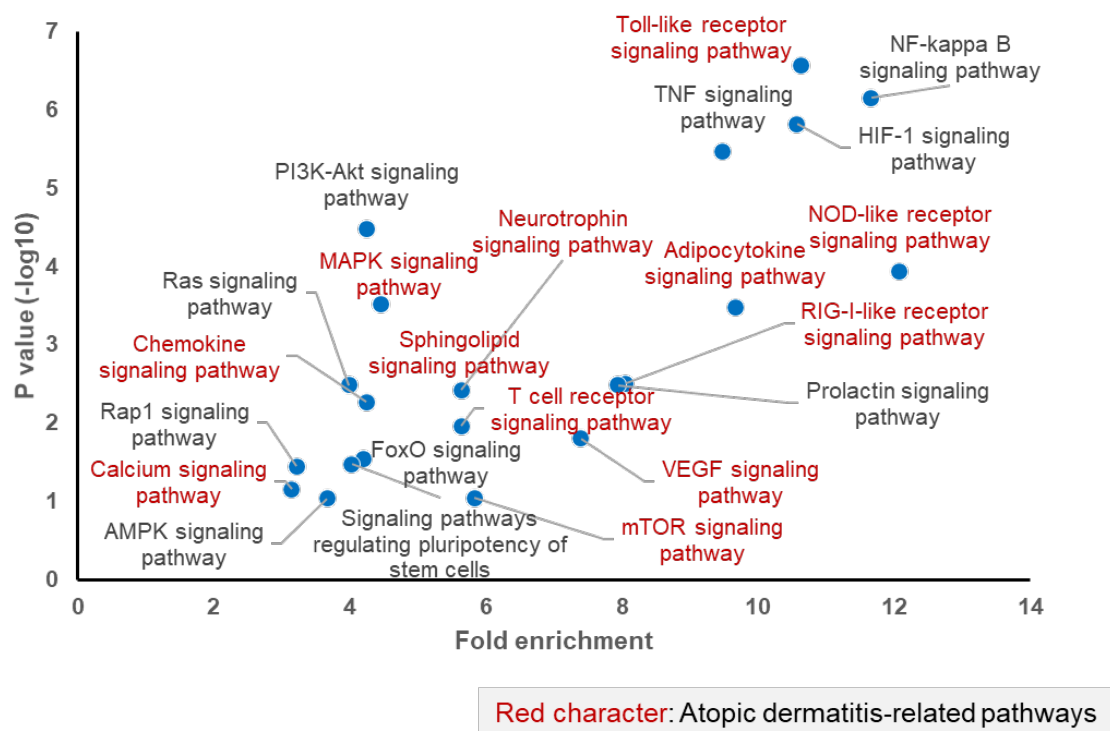

**Supplementary Figure 1.** The KEGG signaling pathways predicted as potential GGRT targets. The network pharmacologic analysis was shown by their fold enrichment and p values according to Ding *et al* [1]. Red characters mean the signaling pathways related to atopic dermatitis determined by GSEA KEGG analysis using two individual gene sets, GSE157194 and GSE140227.

1. Ding, Z.; Zhong, R.; Yang, Y.; Xia, T.; Wang, W.; Wang, Y.; Xing, N.; Luo, Y.; Li, S.; Shang, L., et al. Systems pharmacology reveals the mechanism of activity of Ge-Gen-Qin-Lian decoction against LPS-induced acute lung injury: A novel strategy for exploring active components and effective mechanism of TCM formulae. *Pharmacol Res* 2020, 156, 104759, doi:10.1016/j.phrs.2020.104759.
